# Supplementary material for: Autoprobiotics in the treatment of patients with colorectal cancer in the early postoperative period
Source: Preprints.org preprint supplement (doi:10.20944/preprints202402.1605.v1), 2024-02-28
Supplement: Supplementary file 1 [file supplementary]

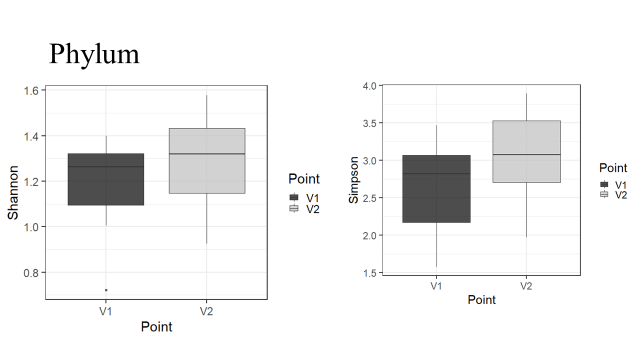


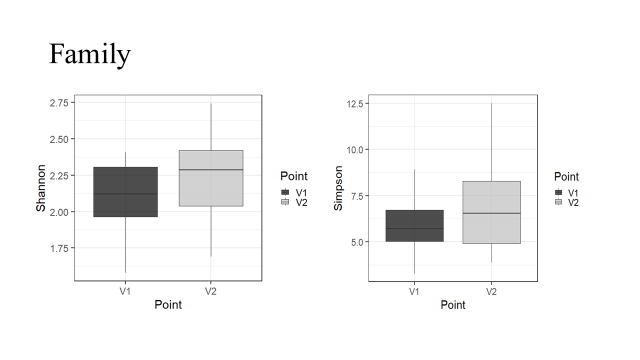


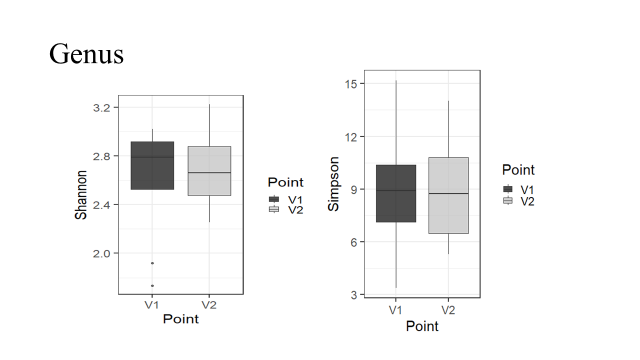


Figure S1. Alpha-biodiversity before and after therapy in the levels of phylum (A), family (B) and genus (C).
